# Supplementary material for: Quaternized carbon dots as efficient catalysts for CO2 cycloaddition under solvent- and cocatalyst-free conditions
Source: Royal Society of Chemistry journal article supplement (doi:10.1039/d4nj02409e), 2024-01-01
Supplement: d4nj02409e1.pdf [file d4nj02409e1.pdf]

## Supporting information

# Quaternized Carbon Dots as Efficient Catalysts for CO<sub>2</sub> Cycloaddition under Solvent- and Cocatalyst-free Conditions

Jinfa Yu, and Xiangying Sun\*

\* College of Materials Science and Engineering, Huaqiao University, Key Laboratory of Molecular Designing and Green Conversions, Fujian University, Xiamen 361021, China.

|                             |           |
|-----------------------------|-----------|
| <b>Figure S1-S2</b> .....   | <b>S2</b> |
| <b>Figure S3-S4</b> .....   | <b>S3</b> |
| <b>Figure S5-S6</b> .....   | <b>S4</b> |
| <b>Figure S7-S8</b> .....   | <b>S5</b> |
| <b>Figure S9-S10</b> .....  | <b>S6</b> |
| <b>Figure S11-S12</b> ..... | <b>S7</b> |
| <b>Figure S13</b> .....     | <b>S8</b> |
| <b>Table S1</b> .....       | <b>S8</b> |

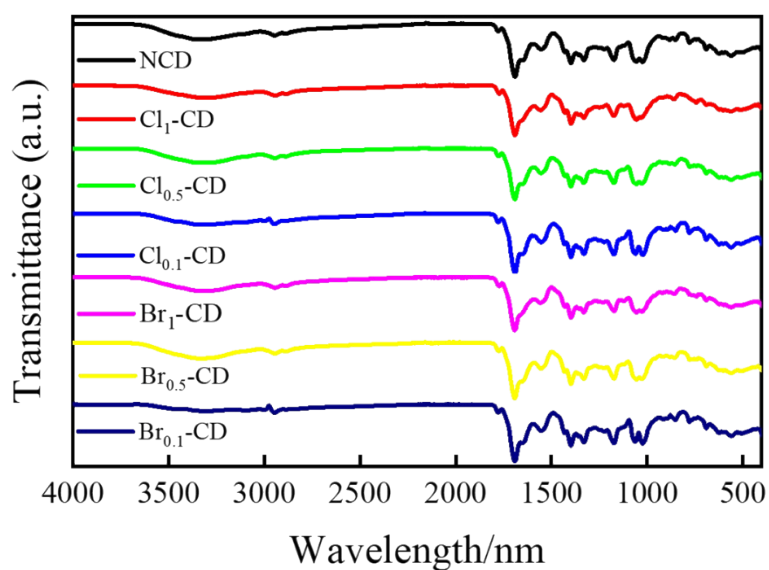

Figure S1 FT-IR spectra of NCD, Br<sub>1</sub>-CD, Br<sub>0.5</sub>-CD, Br<sub>0.1</sub>-CD, Cl<sub>1</sub>-CD, Cl<sub>0.5</sub>-CD, and Cl<sub>0.1</sub>-CD

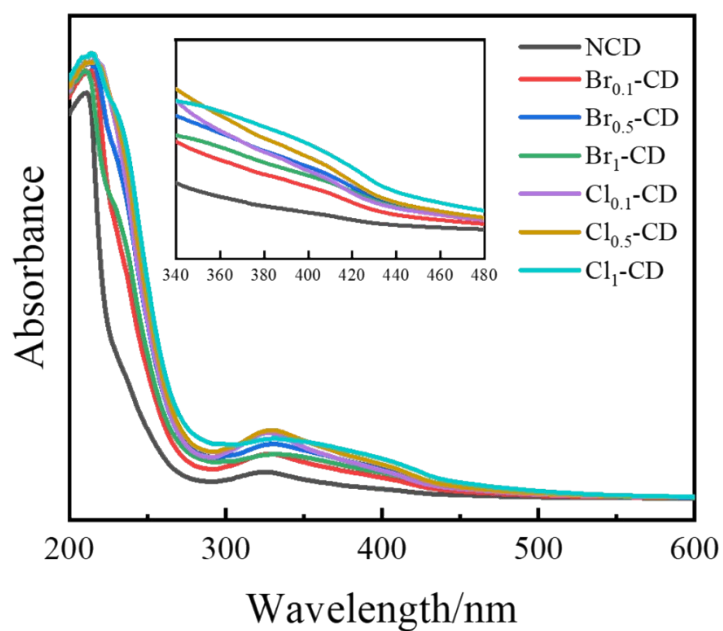

Figure S2 UV-vis spectra of NCD, Br<sub>1</sub>-CD, Br<sub>0.5</sub>-CD, Br<sub>0.1</sub>-CD, Cl<sub>1</sub>-CD, Cl<sub>0.5</sub>-CD, and Cl<sub>0.1</sub>-CD

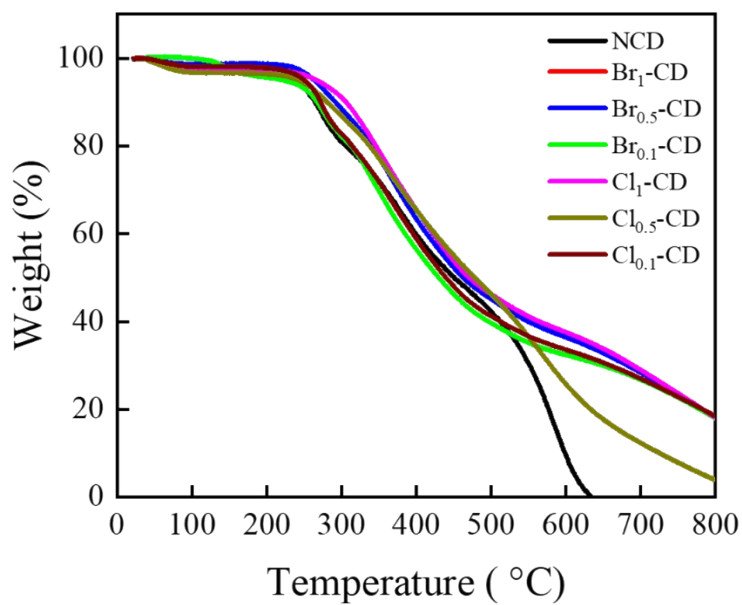

Figure S3 Thermogravimetric analysis (TGA) for NCD, Br<sub>1</sub>-CD, Br<sub>0.5</sub>-CD, Br<sub>0.1</sub>-CD, Cl<sub>1</sub>-CD, Cl<sub>0.5</sub>-CD, and Cl<sub>0.1</sub>-CD

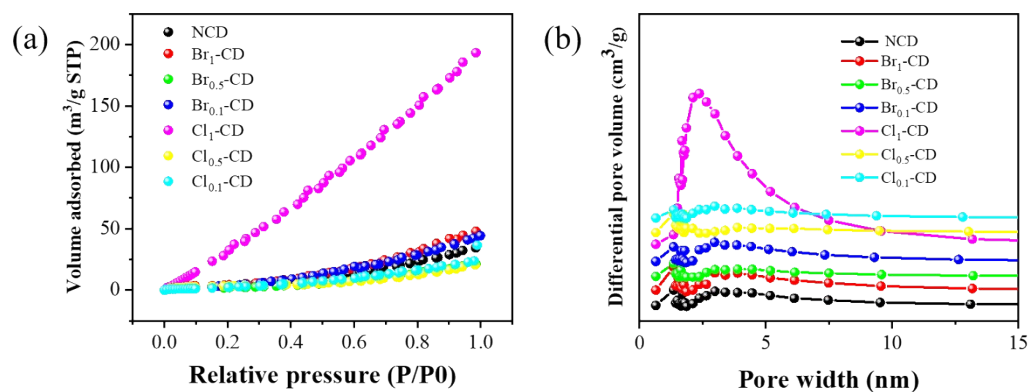

Figure S4 N<sub>2</sub> adsorption-desorption isotherms (a) and pore size distributions (b) of CDs

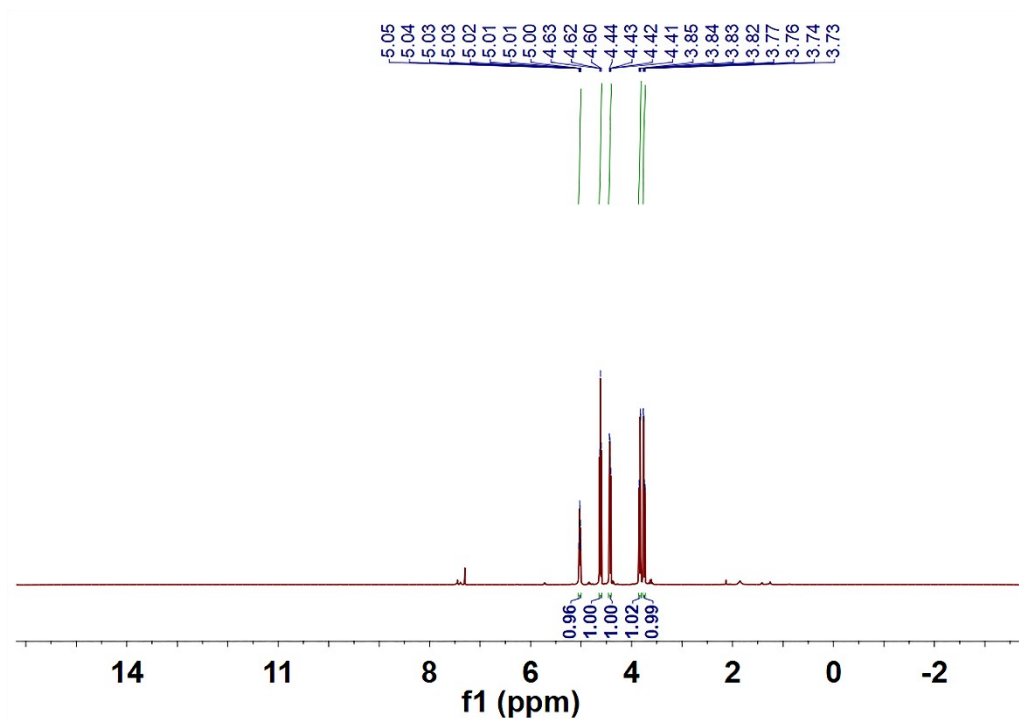

Figure S5  $^1\text{H}$  NMR spectrum of 4-(chloromethyl)-1,3-dioxolan-2-one  
 $^1\text{H}$  NMR (500 MHz,  $\text{CDCl}_3$ )  $\delta$  5.02 (ddd,  $J = 14.2, 5.4, 3.6$  Hz, 1H), 4.62 (t,  $J = 8.6$  Hz, 1H), 4.42 (dd,  $J = 8.9, 5.7$  Hz, 1H), 3.83 (dd,  $J = 12.2, 5.1$  Hz, 1H), 3.75 (dd,  $J = 12.2, 3.6$  Hz, 1H).

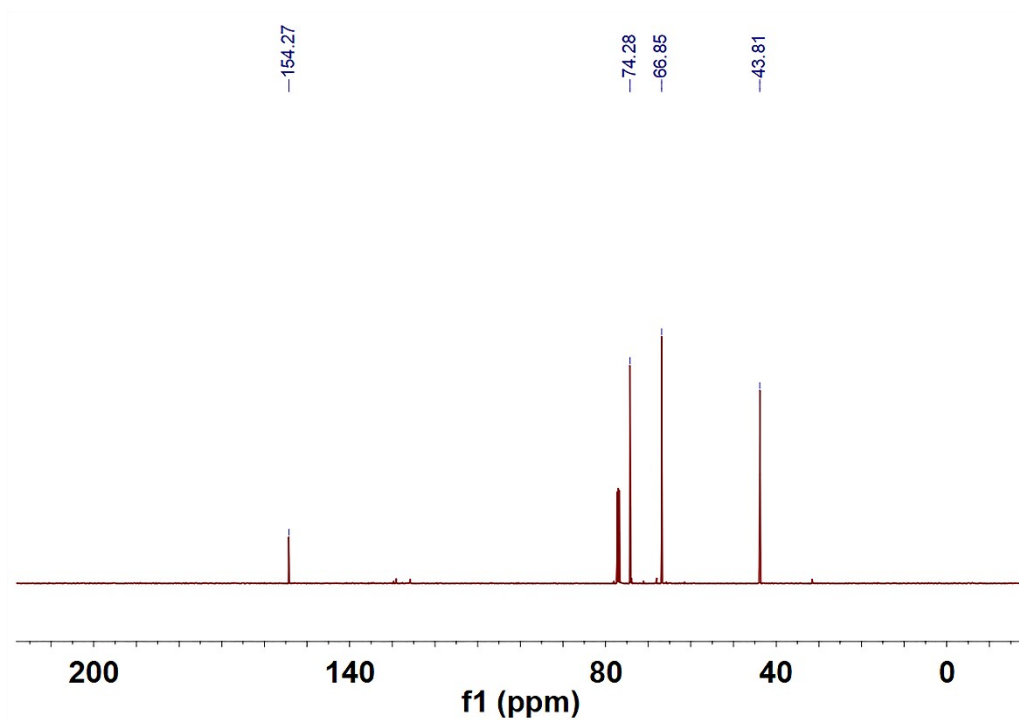

Figure S6  $^{13}\text{C}$  NMR spectrum of 4-(chloromethyl)-1,3-dioxolan-2-one  
 $^{13}\text{C}$  NMR (126 MHz,  $\text{CDCl}_3$ )  $\delta$  154.27 (s), 74.28 (s), 66.85 (s), 43.81 (s).

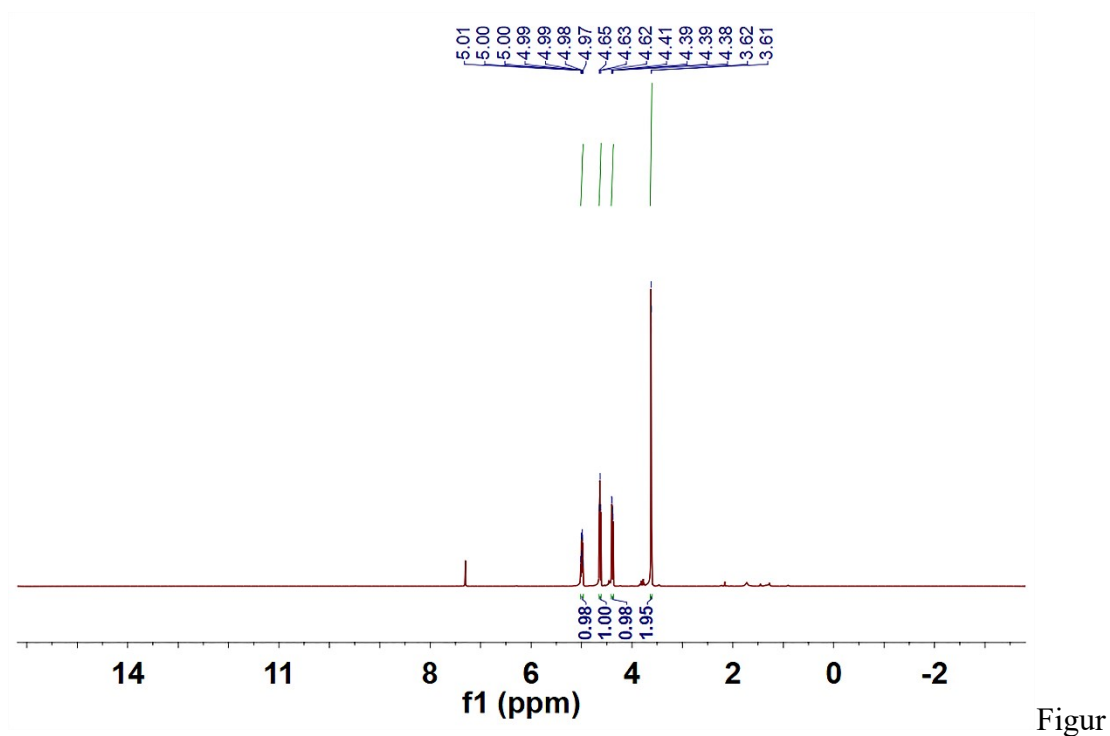

e S7  $^1\text{H}$  NMR spectrum of 4-(bromomethyl)-1,3-dioxolan-2-one  
 $^1\text{H}$  NMR (500 MHz,  $\text{CDCl}_3$ )  $\delta$  5.02 – 4.96 (m, 1H), 4.66 – 4.61 (m, 1H), 4.39 (dd,  $J$  = 8.9, 5.9 Hz, 1H), 3.62 (d,  $J$  = 5.2 Hz, 2H).

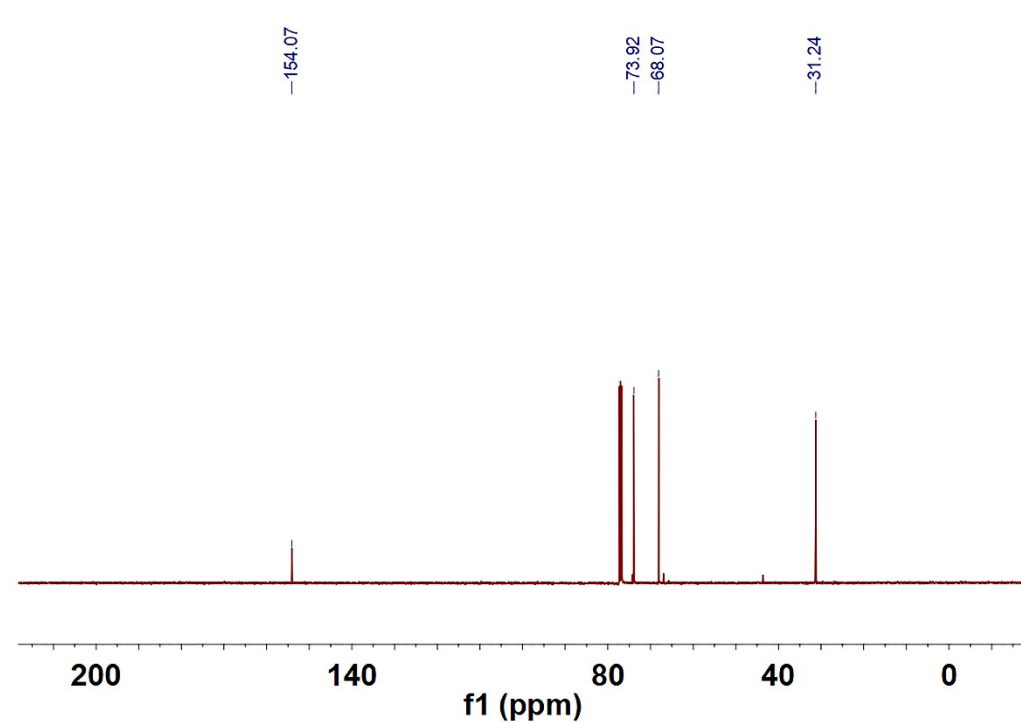

Figure S8  $^{13}\text{C}$  NMR spectrum of 4-(bromomethyl)-1,3-dioxolan-2-one  
 $^{13}\text{C}$  NMR (126 MHz,  $\text{CDCl}_3$ )  $\delta$  154.07 (s), 73.92 (s), 68.07 (s), 31.24 (s).

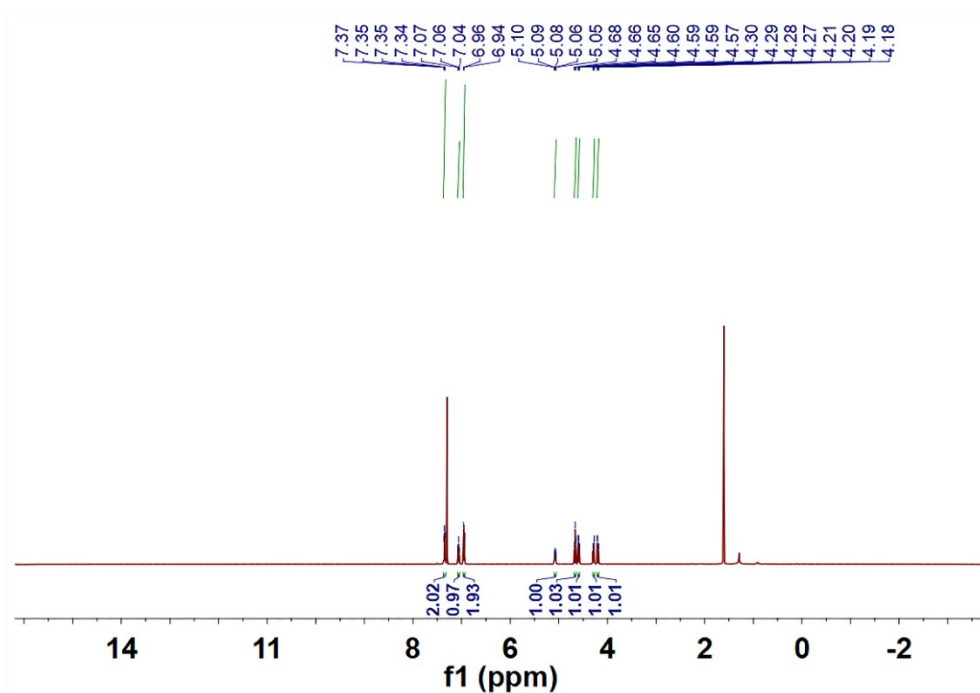

Figure S9  $^1\text{H}$  NMR spectrum of 4-(phenoxyethyl)-1,3-dioxolan-2-one  
 $^1\text{H}$  NMR (500 MHz,  $\text{CDCl}_3$ )  $\delta$  7.35 (dd,  $J = 8.6, 7.4$  Hz, 2H), 7.06 (t,  $J = 7.4$  Hz, 1H), 6.95 (d,  $J = 7.9$  Hz, 2H), 5.10 – 5.05 (m, 1H), 4.66 (t,  $J = 8.4$  Hz, 1H), 4.59 (dd,  $J = 8.5, 5.9$  Hz, 1H), 4.28 (dd,  $J = 10.5, 4.3$  Hz, 1H), 4.20 (dd,  $J = 10.5, 3.6$  Hz, 1H).

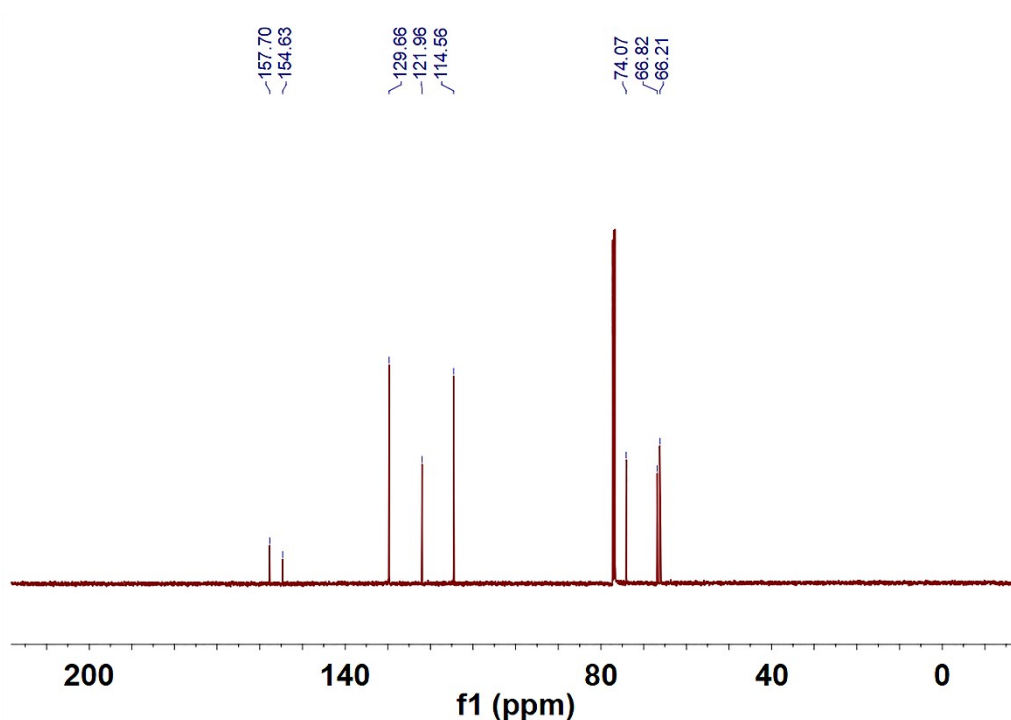

Figure S10  $^{13}\text{C}$  NMR spectrum of 4-(phenoxyethyl)-1,3-dioxolan-2-one  
 $^{13}\text{C}$  NMR (126 MHz,  $\text{CDCl}_3$ )  $\delta$  157.70 (s), 154.63 (s), 129.66 (s), 121.96 (s), 114.56 (s), 74.07 (s), 66.82 (s), 66.21 (s).

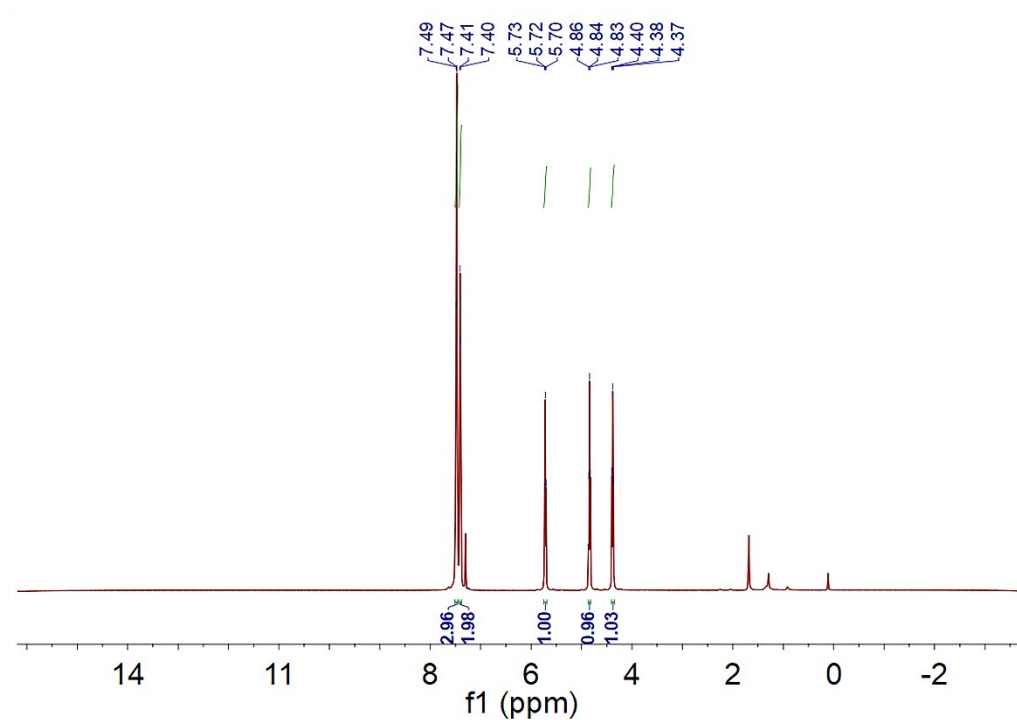

Figure

e S11  $^1\text{H}$  NMR spectrum of 4-phenyl-1, 3-dioxolan-2-one  
 $^1\text{H}$  NMR (500 MHz,  $\text{CDCl}_3$ )  $\delta$  7.48 (d,  $J = 6.8$  Hz, 3H), 7.40 (d,  $J = 7.1$  Hz, 2H), 5.72 (t,  $J = 8.0$  Hz, 1H), 4.84 (t,  $J = 8.4$  Hz, 1H), 4.38 (t,  $J = 8.2$  Hz, 1H).

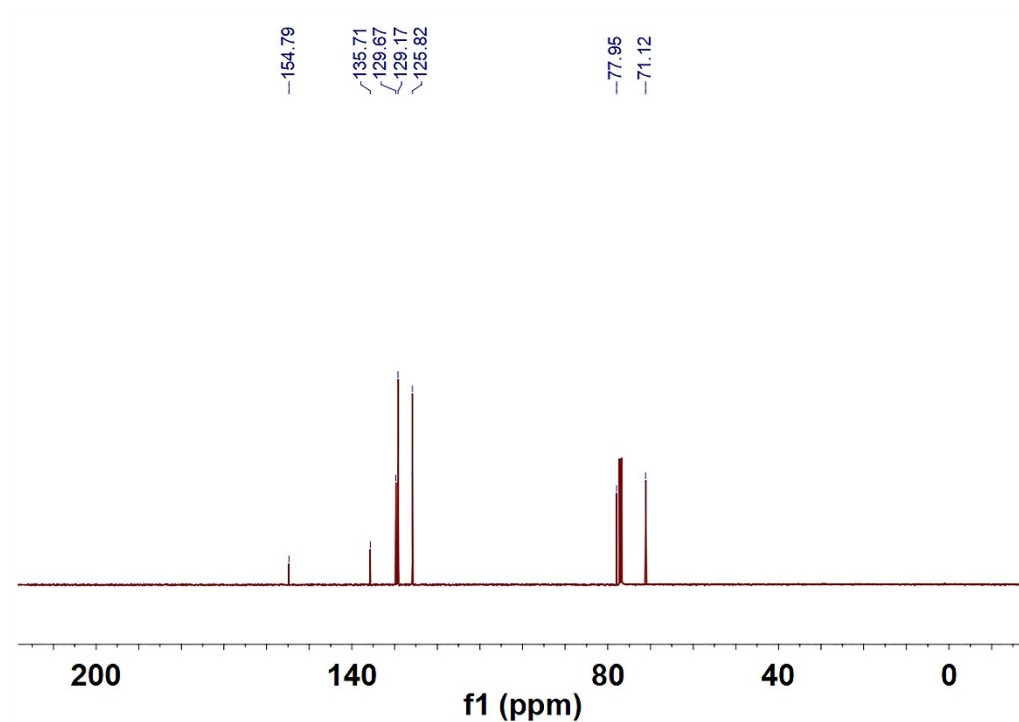

Figure S12  $^{13}\text{C}$  NMR spectrum of 4-phenyl-1, 3-dioxolan-2-one  
 $^{13}\text{C}$  NMR (126 MHz,  $\text{CDCl}_3$ )  $\delta$  154.79 (s), 135.71 (s), 129.67 (s), 129.17 (s), 125.82 (s), 77.95 (s), 71.12 (s).

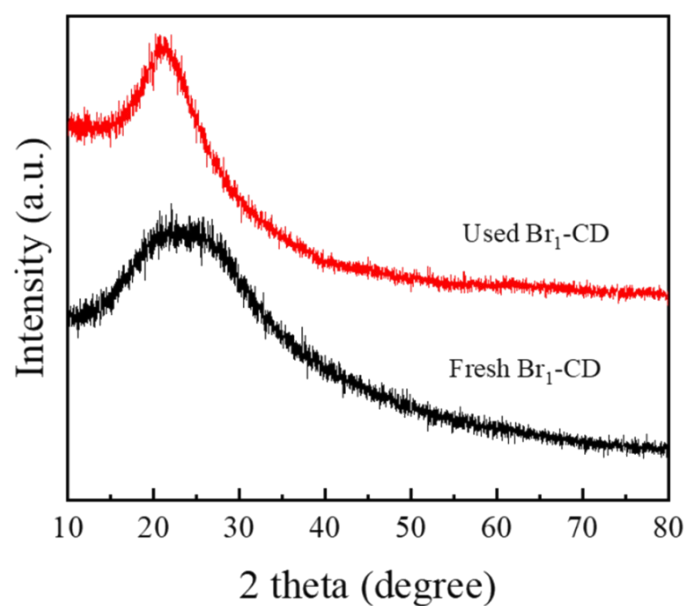

Figure S13 XRD spectra of fresh and used Br<sub>1</sub>-CD

Table S1 Textual properties of carbon dots

| sample                | S <sub>BET</sub> <sup>a</sup> (cm <sup>2</sup> g <sup>-1</sup> ) | V <sub>total</sub> <sup>b</sup> (cm <sup>3</sup> g <sup>-1</sup> ) | D <sub>total</sub> <sup>c</sup> (cm <sup>3</sup> g <sup>-1</sup> ) |
|-----------------------|------------------------------------------------------------------|--------------------------------------------------------------------|--------------------------------------------------------------------|
| NCD                   | 66.937                                                           | 0.153                                                              | 9.143                                                              |
| Br <sub>1</sub> -CD   | 15.167                                                           | 0.074                                                              | 19.533                                                             |
| Br <sub>0.5</sub> -CD | 60.942                                                           | 0.126                                                              | 8.271                                                              |
| Br <sub>0.1</sub> -CD | 9.557                                                            | 0.069                                                              | 28.722                                                             |
| Cl <sub>1</sub> -CD   | 170.588                                                          | 0.299                                                              | 7.011                                                              |
| Cl <sub>0.5</sub> -CD | 16.081                                                           | 0.032                                                              | 7.862                                                              |
| Cl <sub>0.1</sub> -CD | 5.151                                                            | 0.056                                                              | 43.834                                                             |

<sup>a</sup> BET surface area

<sup>b</sup> Total pore volume

<sup>c</sup> Average pore size for total pores



Table S2 Br<sup>-</sup> content of reused carbon dots

| Catalyst                   | Br <sup>-</sup> content (mmol/g) <sup>a</sup> |
|----------------------------|-----------------------------------------------|
| Reused Br <sub>1</sub> -CD | 0.890                                         |

<sup>a</sup> Br<sup>-</sup> content detected by IC
